# Supplementary figures and images for: Functional analysis reveals differential effects of glutamate and MCH neuropeptide in MCH neurons
Source: PubMed Central journal article supplement — Mol Metab. 2018 May 8;13:83–9. doi: 10.1016/j.molmet.2018.05.001 (PMC6026325; doi:10.1016/j.molmet.2018.05.001), 2018-05-08

A

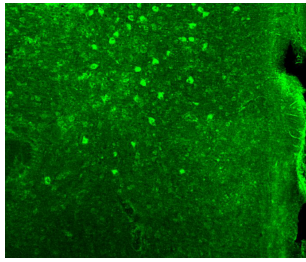

Vglut fl/fl

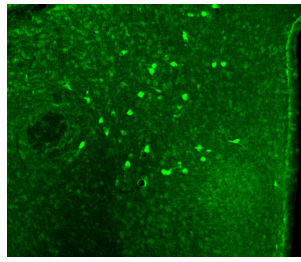

MCH Cre; Vglut fl/fl

B

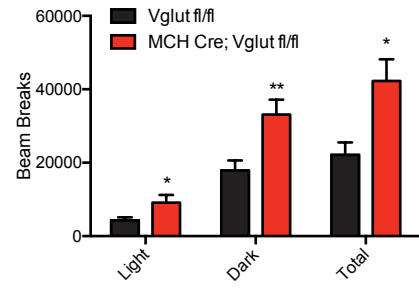

C

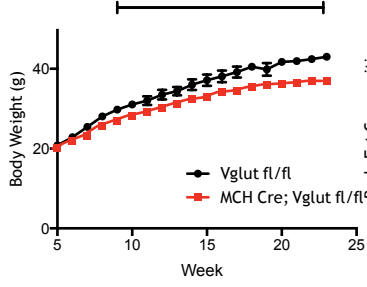

D

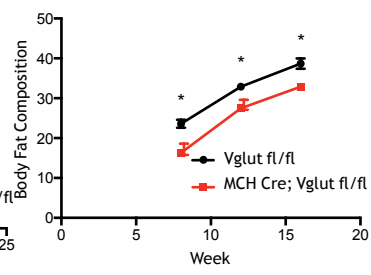

E

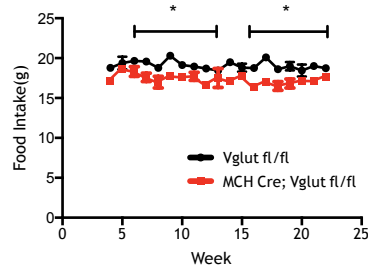

F

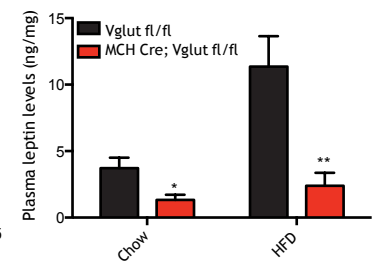

Supplement: mmc1.pdf [file mmc1.pdf]
